# Supplementary material
Source: PubMed Central journal article supplement (PMC8362591)
Supplement: NEJMoa2109072_data-sharing.pdf [file NEJMoa2109072_data-sharing.pdf]

## Data Sharing Statement

Bergwerk M, Gonen T, Lustig Y, et al. Covid-19 Breakthrough Infections in Vaccinated Health Care Workers. N Engl J Med. DOI: 10.1056/NEJMoa2109072.

| Question                                                            | Authors' Response                                                                  |
|---------------------------------------------------------------------|------------------------------------------------------------------------------------|
| Will the data collected for your study be made available to others? | Yes                                                                                |
| Would you like to offer context for your decision?                  | —                                                                                  |
| Which data?                                                         | Complete de-identified patient data set                                            |
| Additional information about data                                   | —                                                                                  |
| How or where can the data be obtained?                              | <a href="mailto:gili.regev@sheba.health.gov.il">gili.regev@sheba.health.gov.il</a> |
| When will data availability begin?                                  | With publication                                                                   |
| When will data availability end?                                    | —                                                                                  |
| Will any supporting documents be available?                         | —                                                                                  |
| Which supporting documents?                                         | Analytic/Statistical code. Informed Consent Form                                   |
| Additional information about supporting documents                   | —                                                                                  |
| How or where can supporting documents be obtained?                  | <a href="mailto:gili.regev@sheba.health.gov.il">gili.regev@sheba.health.gov.il</a> |
| When will supporting documents availability begin?                  | With publication                                                                   |
| When will supporting documents availability end?                    | —                                                                                  |
| To whom will data be available?                                     | Anyone requesting data                                                             |
| For what type of analysis or purpose?                               | For any research purpose                                                           |
| By what mechanism?                                                  | Signed data access agreement                                                       |
| Any other restrictions?                                             | —                                                                                  |
| Additional information                                              | No                                                                                 |

This statement was posted on July 28, 2021, at NEJM.org.
