# Supplementary material
Source: PubMed Central journal article supplement (PMC8362591)
Supplement: NEJMoa2109072_disclosures.pdf [file NEJMoa2109072_disclosures.pdf]

**Disclosure Purpose:** 21-09072

Summary of Interests

I do not have any interests to disclose at this time.

Additional Questions:

- 1. **Are there other relationships or activities that readers could perceive to have influenced, or that give the appearance of potentially influencing, what you wrote in the submitted work?**  
No.
- 2. **What is the manuscript title?**  
Defining Correlates of COVID-19 Breakthrough infections in Vaccinated HCW
- 3. **Are you the corresponding author?**  
No.

Certification

I certify that the information provided in this disclosure is complete and accurate.

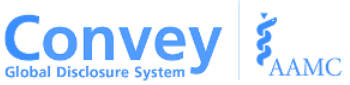

**Disclosure Purpose:** 21-09072

## Summary of Interests

I do not have any interests to disclose at this time.

## Additional Questions:

- Are there other relationships or activities that readers could perceive to have influenced, or that give the appearance of potentially influencing, what you wrote in the submitted work?**  
No.
- What is the manuscript title?**  
Defining correlates of covid-19 breakthrough infections in vaccinated HCW
- Are you the corresponding author?**  
No.

## Certification

I certify that the information provided in this disclosure is complete and accurate.

**Disclosure Purpose:** 21-09072

### Summary of Interests

I do not have any interests to disclose at this time.

### Additional Questions:

- Are there other relationships or activities that readers could perceive to have influenced, or that give the appearance of potentially influencing, what you wrote in the submitted work?**  
No.
- What is the manuscript title?**  
Defining Correlates of COVID-19 Breakthrough infections in Vaccinated HCW
- Are you the corresponding author?**  
No.

### Certification

I certify that the information provided in this disclosure is complete and accurate.

**Disclosure Purpose:** 21-09072

**Summary of Interests**

I do not have any interests to disclose at this time.

**Additional Questions:**

- 1. **Are there other relationships or activities that readers could perceive to have influenced, or that give the appearance of potentially influencing, what you wrote in the submitted work?**  
No.
- 2. **What is the manuscript title?**  
Defining Correlates of COVID-19 Breakthrough infections in Vaccinated HCW
- 3. **Are you the corresponding author?**  
No.

**Certification**

I certify that the information provided in this disclosure is complete and accurate.

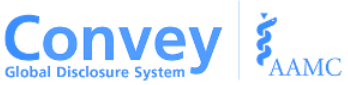

**Disclosure Purpose:** 21-09072

### Summary of Interests

I do not have any interests to disclose at this time.

### Additional Questions:

- Are there other relationships or activities that readers could perceive to have influenced, or that give the appearance of potentially influencing, what you wrote in the submitted work?**  
No.
- What is the manuscript title?**  
Defining correlates of covid-19 breakthrough infections in vaccinated HCW
- Are you the corresponding author?**  
No.

### Certification

I certify that the information provided in this disclosure is complete and accurate.

**Disclosure Purpose:** 21-09072

### Summary of Interests

I do not have any interests to disclose at this time.

### Additional Questions:

- Are there other relationships or activities that readers could perceive to have influenced, or that give the appearance of potentially influencing, what you wrote in the submitted work?**  
No.
- What is the manuscript title?**  
Defining Correlates of COVID-19 Breakthrough infections in Vaccinated HCW
- Are you the corresponding author?**  
No.

### Certification

I certify that the information provided in this disclosure is complete and accurate.

**Disclosure Purpose:** 21-09072

**Summary of Interests**

I do not have any interests to disclose at this time.

**Additional Questions:**

- 1. **Are there other relationships or activities that readers could perceive to have influenced, or that give the appearance of potentially influencing, what you wrote in the submitted work?**  
No.
- 2. **What is the manuscript title?**  
Defining Correlates of COVID-19 Breakthrough Infections in Vaccinated HCW
- 3. **Are you the corresponding author?**  
No.

**Certification**

I certify that the information provided in this disclosure is complete and accurate.



Disclosure Purpose: 21-09072

## Summary of Interests

### Company or Organization

| Entity                                                                                                                                                                                                                       | Type             | Interest Held By                                                                |
|------------------------------------------------------------------------------------------------------------------------------------------------------------------------------------------------------------------------------|------------------|---------------------------------------------------------------------------------|
| <a href="#">Andrew and Corey Morris-Singer Foundation</a>                                                                                                                                                                    | Gift             | Self                                                                            |
| <i>Description:</i> Fund for the Center for Communicable Disease Dynamics                                                                                                                                                    |                  | <i>Additional Information:</i> Institutional research support                   |
| <a href="#">Bristol-Myers Squibb</a>                                                                                                                                                                                         | Other            | Self                                                                            |
| <i>Category:</i> Other<br><i>Additional Information:</i>                                                                                                                                                                     |                  | <i>Description:</i> Honorarium for a talk                                       |
| <a href="#">Centers for Disease Control and Prevention</a>                                                                                                                                                                   | Grant / Contract | Self                                                                            |
| <i>Recipient Name:</i> President Fellows Harvard College<br><i>Grant / Contract Description:</i> Subcontract via University of Utah<br><i>Additional Information:</i>                                                        |                  | <i>Recipient Type:</i> Institution<br><i>Grant / Contract Purpose:</i> Research |
| <a href="#">Coalition for Epidemic Preparedness Innovations</a>                                                                                                                                                              | Consultant       | Self                                                                            |
| <i>Category:</i> Consultant<br><i>Additional Information:</i> unpaid                                                                                                                                                         |                  | <i>Description:</i> Member of Scientific Advisory Committee                     |
| <a href="#">Janssen Biotech</a>                                                                                                                                                                                              | Consultant       | Self                                                                            |
| <i>Category:</i> Consultant<br><i>Additional Information:</i>                                                                                                                                                                |                  | <i>Description:</i> Advisory board - Ebola vaccine studies                      |
| <a href="#">Merck</a>                                                                                                                                                                                                        | Consultant       | Self                                                                            |
| <i>Category:</i> Consultant<br><i>Additional Information:</i>                                                                                                                                                                |                  | <i>Description:</i> Advisory board - pneumococcal                               |
| <a href="#">National Institute for Health Research</a>                                                                                                                                                                       | Grant / Contract | Self                                                                            |
| <i>Recipient Name:</i> Marc Lipsitch<br><i>Grant / Contract Description:</i><br><i>Additional Information:</i>                                                                                                               |                  | <i>Recipient Type:</i> Institution<br><i>Grant / Contract Purpose:</i> Research |
| <a href="#">National Institutes of Health</a>                                                                                                                                                                                | Grant / Contract | Self                                                                            |
| <i>Recipient Name:</i> President Fellows Harvard College<br><i>Grant / Contract Description:</i><br><i>Additional Information:</i>                                                                                           |                  | <i>Recipient Type:</i> Institution<br><i>Grant / Contract Purpose:</i> Research |
| <a href="#">One Day Sooner</a>                                                                                                                                                                                               | Other            | Self                                                                            |
| <i>Category:</i> Other<br><i>Additional Information:</i> no longer affiliated                                                                                                                                                |                  | <i>Description:</i> Previously provided unpaid advice                           |
| <a href="#">Peter Diamandis / Abundance Platinum</a>                                                                                                                                                                         | Consultant       | Self                                                                            |
| <i>Category:</i> Consultant<br><i>Additional Information:</i> 5000 USD/4 h                                                                                                                                                   |                  | <i>Description:</i> consultant on COVID safety for their investor trips         |
| <a href="#">Pfizer</a>                                                                                                                                                                                                       | Grant / Contract | Self                                                                            |
| <i>Recipient Name:</i> President Fellows Harvard College<br><i>Grant / Contract Description:</i> pneumococcal epidemiology, COVID epidemiology<br><i>Additional Information:</i> also have provided unpaid scientific advice |                  | <i>Recipient Type:</i> Institution<br><i>Grant / Contract Purpose:</i> Research |
| <a href="#">SANOFI PASTEUR BIOLOGICS LLC</a>                                                                                                                                                                                 | Consultant       | Self                                                                            |
| <i>Category:</i> Consultant<br><i>Additional Information:</i>                                                                                                                                                                |                  | <i>Description:</i> Honorarium - talk                                           |
| <a href="#">Silicon Valley Community Foundation</a>                                                                                                                                                                          | Grant / Contract | Self                                                                            |
| <i>Recipient Name:</i> President Fellows Harvard College<br><i>Grant / Contract Description:</i><br><i>Additional Information:</i>                                                                                           |                  | <i>Recipient Type:</i> Institution<br><i>Grant / Contract Purpose:</i> Research |



united biomedical

Consultant

Self

**Category:** Consultant  
**Additional Information:**

**Description:** member SAB, have resigned due to inadequate time

#### Additional Questions:

- 1. Are there other relationships or activities that readers could perceive to have influenced, or that give the appearance of potentially influencing, what you wrote in the submitted work?**  
No.
- 2. What is the manuscript title?**  
Defining Correlates of COVID-19 Breakthrough infections in Vaccinated HCW
- 3. Are you the corresponding author?**  
No.

#### Certification

I certify that the information provided in this disclosure is complete and accurate.

**Disclosure Purpose:** 21-09072

Summary of Interests

I do not have any interests to disclose at this time.

Additional Questions:

- 1. **Are there other relationships or activities that readers could perceive to have influenced, or that give the appearance of potentially influencing, what you wrote in the submitted work?**  
No.
- 2. **What is the manuscript title?**  
Defining Correlates of COVID-19 Breakthrough infections in Vaccinated HCW
- 3. **Are you the corresponding author?**  
No.

Certification

I certify that the information provided in this disclosure is complete and accurate.

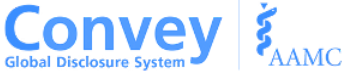

**Disclosure Purpose:** 21-09072

### Summary of Interests

I do not have any interests to disclose at this time.

### Additional Questions:

- Are there other relationships or activities that readers could perceive to have influenced, or that give the appearance of potentially influencing, what you wrote in the submitted work?**  
No.
- What is the manuscript title?**  
Defining Correlates of COVID-19 Breakthrough Infections in Vaccinated HCW
- Are you the corresponding author?**  
No.

### Certification

I certify that the information provided in this disclosure is complete and accurate.

Disclosure Purpose: 21-09072

## Summary of Interests

### Company or Organization

| Entity                                                                                                                                  | Type             | Interest Held By                                                                |
|-----------------------------------------------------------------------------------------------------------------------------------------|------------------|---------------------------------------------------------------------------------|
| <a href="#">Pfizer</a>                                                                                                                  | Grant / Contract | Self                                                                            |
| <i>Recipient Name:</i> Gili Regev-Yochay<br><i>Grant / Contract Description:</i> Pneumococcal Disease<br><i>Additional Information:</i> |                  | <i>Recipient Type:</i> Institution<br><i>Grant / Contract Purpose:</i> Research |
| <a href="#">Teva Pharmaceutical Industries</a>                                                                                          | Consultant       | Self                                                                            |
| <i>Category:</i> Consultant<br><i>Additional Information:</i>                                                                           |                  | <i>Description:</i> Lectures on fluids and infection control                    |

## Additional Questions:

- Are there other relationships or activities that readers could perceive to have influenced, or that give the appearance of potentially influencing, what you wrote in the submitted work?**  
No.
- What is the manuscript title?**  
Defining correlates of COVID-19 breakthrough infections in vaccinated HCW
- Are you the corresponding author?**  
Yes.
  - Please list the other authors' names here.**  
M. Bergwerk, T. Gonen, Y. Lustig, S. Amit, M. Lipsitch, C. Cohen, M. Mandelboim, E. Sapir, C. Rubin, V. Indenbaum, I. Tal, M. Zavitan, N. Zuckerman, A. Bar-Chaim, Y. Kreiss

## Certification

I certify that the information provided in this disclosure is complete and accurate.

**Disclosure Purpose:** 21-09072

## Summary of Interests

I do not have any interests to disclose at this time.

## Additional Questions:

- Are there other relationships or activities that readers could perceive to have influenced, or that give the appearance of potentially influencing, what you wrote in the submitted work?**  
No.
- What is the manuscript title?**  
defining correlates of covid-19 breakthrough infections in vaccinated HCW
- Are you the corresponding author?**  
No.

## Certification

I certify that the information provided in this disclosure is complete and accurate.

**Disclosure Purpose:** 21-09072

**Summary of Interests**

I do not have any interests to disclose at this time.

**Additional Questions:**

- 1. **Are there other relationships or activities that readers could perceive to have influenced, or that give the appearance of potentially influencing, what you wrote in the submitted work?**  
No.
- 2. **What is the manuscript title?**  
Defining Correlates of COVID-19 Breakthrough infections in Vaccinated HCW
- 3. **Are you the corresponding author?**  
No.

**Certification**

I certify that the information provided in this disclosure is complete and accurate.



**Disclosure Purpose:** 21-09072

**Summary of Interests**

I do not have any interests to disclose at this time.

**Additional Questions:**

- 1. **Are there other relationships or activities that readers could perceive to have influenced, or that give the appearance of potentially influencing, what you wrote in the submitted work?**  
No.
- 2. **What is the manuscript title?**  
Defining Correlates of COVID-19 Breakthrough infections in vaccinated HCW
- 3. **Are you the corresponding author?**  
No.

**Certification**

I certify that the information provided in this disclosure is complete and accurate.

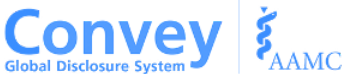

**Disclosure Purpose:** 21-09072

### Summary of Interests

I do not have any interests to disclose at this time.

### Additional Questions:

- Are there other relationships or activities that readers could perceive to have influenced, or that give the appearance of potentially influencing, what you wrote in the submitted work?**  
No.
- What is the manuscript title?**  
Defining Correlates of COVID-19 Breakthrough Infections in Vaccinated HCW
- Are you the corresponding author?**  
No.

### Certification

I certify that the information provided in this disclosure is complete and accurate.



**Disclosure Purpose:** 21-09072

## Summary of Interests

I do not have any interests to disclose at this time.

## Additional Questions:

- Are there other relationships or activities that readers could perceive to have influenced, or that give the appearance of potentially influencing, what you wrote in the submitted work?**  
No.
- What is the manuscript title?**  
Defining Correlates of COVID-19 Breakthrough infections in Vaccinated HCW
- Are you the corresponding author?**  
No.

## Certification

I certify that the information provided in this disclosure is complete and accurate.
